# Supplementary material for: An umpolung strategy to react catalytic enols with nucleophiles
Source: PubMed Central journal article supplement (PMC6868166; doi:10.1038/s41467-019-13175-5), 2019-11-20
Supplement: 41467_2019_13175_MOESM3_ESM.pdf [file 41467_2019_13175_MOESM3_ESM.pdf]

## Description of Additional Supplementary Files

File Name: Supplementary Data 1

Description: The Cartesian Coordinates of the DFT calculations.
